# Supplementary material for: Decreased expression of MT1E is a potential biomarker of prostate cancer progression
Source: PubMed Central journal article supplement (PMC5617458; doi:10.18632/oncotarget.18683), 2017-06-27
Supplement: oncotarget-08-61709-s001.pdf [file oncotarget-08-61709-s001.pdf]

# Decreased expression of *MT1E* is a potential biomarker of prostate cancer progression

## SUPPLEMENTARY MATERIALS

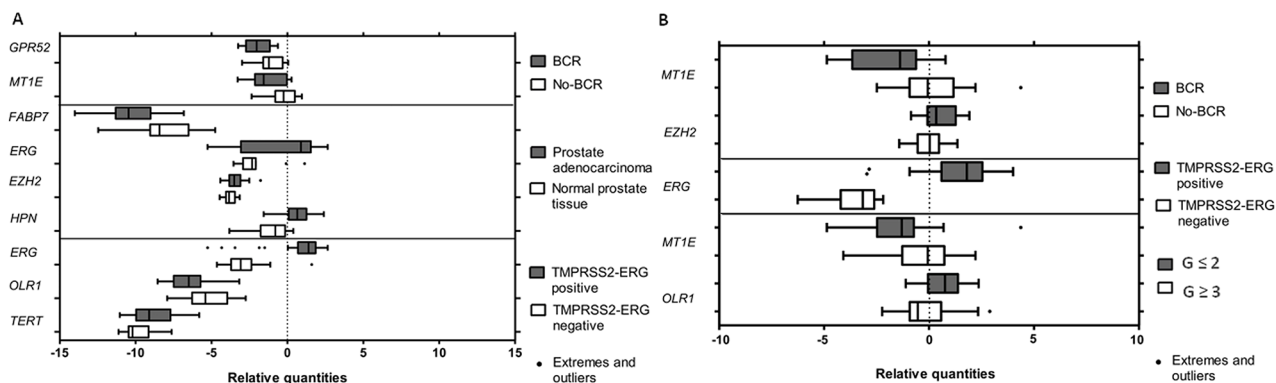

**Supplementary Figure 1: Genes showing significantly different expression levels between groups in TLDA (A) and single gene assay RT-qPCR (B) experiment analyses.** BCR – biochemical recurrence, No-BCR – non-relapsed cases, *TMPRSS2-ERG* positive/negative – *TMPRSS2-ERG* fusion-positive/negative prostate cancer cases.

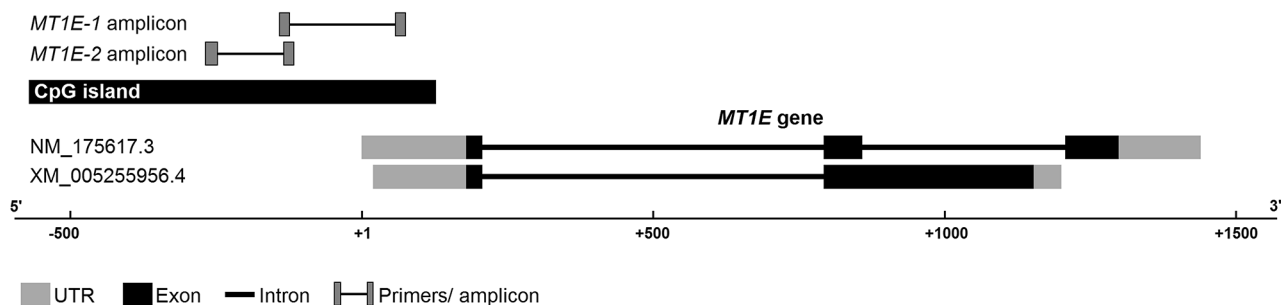

**Supplementary Figure 2: Schematic representation of the two fragments (*MT1E-1* and *MT1E-2*), amplified with primers for methylation-specific PCR (MSP), with regard to *MT1E* gene location.** Two known *MT1E* gene transcripts are shown. Transcription start site of the protein-coding transcript (NM\_175617.3) is depicted as +1. Sequences for the illustration were obtained from GeneBank. UTR – untranslated region.

Supplementary Table 1: Cox regression hazard analysis in PCa1 and PCa2 cohorts

| <b>PCa1 cohort</b>                      |                                                 | <b>Significance</b> |                      |
|-----------------------------------------|-------------------------------------------------|---------------------|----------------------|
| <b>Parameter</b>                        | <b>Univariate Cox<br/>Hazard ratio [95% CI]</b> | <b>P-value</b>      | <b>Model P-value</b> |
| Tumor stage (pT3 vs pT2)                | 2.9469 [1.1285 - 7.6954]                        | <b>0.0273</b>       | <b>0.0292</b>        |
| ISUP Gleason grade group (G3-5 vs G1-2) | 5.0014 [1.7631 - 14.1875]                       | <b>0.0025</b>       | <b>0.0056</b>        |
| Preoperative PSA                        | 0.9975 [0.9528 - 1.0443]                        | 0.9147              | 0.9130               |
| <i>MT1E</i> expression <sup>a</sup>     | 0.6643 [0.4265 - 1.0346]                        | 0.0704              | 0.0747               |
| <i>GPR52</i> expression                 | 0.7059 [0.4272 - 1.1664]                        | 0.1741              | 0.1725               |
| <i>EZH2</i> expression                  | 1.9683 [0.7451 - 5.1994]                        | 0.1718              | 0.1728               |
| <i>HPN</i> expression                   | 0.7928 [0.4615 - 1.3620]                        | 0.4004              | 0.4073               |
| <b>PCa2 cohort</b>                      |                                                 | <b>Significance</b> |                      |
| <b>Parameter</b>                        | <b>Univariate Cox<br/>Hazard ratio [95% CI]</b> | <b>P-value</b>      | <b>Model P-value</b> |
| Tumor stage (pT3 vs pT2)                | 7.4605 [2.3523 - 23.6616]                       | <b>0.0006</b>       | <b>0.0002</b>        |
| ISUP Gleason grading group              | 3.8448 [1.3616 - 10.8566]                       | <b>0.0110</b>       | <b>0.0103</b>        |
| Preoperative PSA                        | 1.0705 [1.0296 - 1.1130]                        | <b>0.0006</b>       | <b>0.0020</b>        |
| <i>MT1E</i> expression                  | 0.5471 [0.4020 - 0.7445]                        | <b>0.0001</b>       | <b>0.0001</b>        |
| <i>GPR52</i> expression                 | 1.0011 [0.5611 - 1.7862]                        | 0.9969              | 0.9952               |
| <i>EZH2</i> expression                  | 2.393 [1.1685 - 4.9003]                         | <b>0.0170</b>       | <b>0.0167</b>        |
| <i>HPN</i> expression                   | 0.7504 [0.3898 - 1.4445]                        | 0.3901              | 0.3900               |

Significant P-values are in bold.

<sup>a</sup>For gene expression, normalized Ct values were used.

**Supplementary Table 2: Significant associations between clinical variables, and between clinical variables and genes' expression in combined cohort**

| Mann-Whitney U-test             | Z      | P-level | N   |
|---------------------------------|--------|---------|-----|
| pT & PSA                        | 3.225  | 0.001   | 106 |
| pT & <i>MTIE</i>                | -2.792 | 0.005   | 108 |
| G & PSA                         | 2.154  | 0.031   | 106 |
| G & <i>MTIE</i>                 | -3.500 | 0.000   | 108 |
| G & <i>OLR1</i>                 | 3.340  | 0.001   | 108 |
| G & <i>EZH2</i>                 | 2.997  | 0.003   | 108 |
| BCR & PSA                       | 2.092  | 0.036   | 100 |
| BCR & <i>MTIE</i>               | -3.464 | 0.001   | 102 |
| <i>TMPRSS2-ERG</i> & <i>ERG</i> | 7.039  | <0.001  | 106 |
| Spearman's correlation          | R      | P-level | N   |
| <i>ERG</i> & <i>HPN</i>         | 0.339  | <0.001  | 108 |
| <i>EZH2</i> & <i>HPN</i>        | -0.592 | <0.001  | 108 |
| <i>GPR52</i> & <i>MTIE</i>      | 0.429  | <0.001  | 108 |
| <i>MTIE</i> & <i>EZH2</i>       | -0.488 | <0.001  | 108 |
| <i>MTIE</i> & <i>HPN</i>        | 0.367  | <0.001  | 108 |
| <i>MTIE</i> & <i>OLR1</i>       | -0.523 | <0.001  | 108 |
| <i>MTIE</i> & <i>TERT</i>       | -0.469 | <0.001  | 108 |
| <i>OLR1</i> & <i>ERG</i>        | -0.305 | <0.001  | 108 |
| <i>OLR1</i> & <i>EZH2</i>       | 0.802  | <0.001  | 108 |
| <i>OLR1</i> & <i>HPN</i>        | -0.702 | <0.001  | 108 |
| <i>OLR1</i> & <i>TERT</i>       | 0.744  | <0.001  | 108 |
| <i>TERT</i> & <i>EZH2</i>       | 0.868  | <0.001  | 108 |
| <i>TERT</i> & <i>HPN</i>        | -0.624 | <0.001  | 108 |
| Fisher's exact test             |        | P-level | N   |
| G & BCR                         |        | 0.001   | 102 |
| pT & BCR                        |        | 0.001   | 102 |
| pT & G                          |        | 0.004   | 108 |

pT – tumor stage, G – ISUP grade group, BCR – biochemical disease recurrence.

**Supplementary Table 3: Gene expression assays included into custom design TLDA card and used in single gene experiments**

| Assay ID      | TLDA assays | Single gene assays | Gene symbol   | Gene name                                                 |
|---------------|-------------|--------------------|---------------|-----------------------------------------------------------|
| Hs01060665_g1 | +           | -                  | <i>ACTB</i>   | actin, beta                                               |
| Hs00984230_m1 | +           | -                  | <i>B2M</i>    | beta-2-microglobulin                                      |
| Hs00970220_m1 | +           | -                  | <i>CHI3L2</i> | chitinase 3-like 2                                        |
| Hs01554629_m1 | +           | +                  | <i>ERG</i>    | v-ets erythroblastosis virus E26 oncogene homolog (avian) |
| Hs00544833_m1 | +           | +                  | <i>EZH2</i>   | enhancer of zeste homolog 2 (Drosophila)                  |
| Hs00361426_m1 | +           | -                  | <i>FABP7</i>  | fatty acid binding protein 7, brain                       |
| Hs99999905_m1 | +           | -                  | <i>GAPDH</i>  | glyceraldehyde-3-phosphate dehydrogenase                  |
| Hs00184139_m1 | +           | -                  | <i>GHRH</i>   | growth hormone releasing hormone                          |
| Hs00271672_s1 | +           | +                  | <i>GPR52</i>  | G protein-coupled receptor 52                             |
| Hs00939627_m1 | +           | +                  | <i>GUSB</i>   | glucuronidase, beta                                       |
| Hs01056332_m1 | +           | +                  | <i>HPN</i>    | hepsin                                                    |
| Hs02800695_m1 | +           | +                  | <i>HPRT1</i>  | hypoxanthine phosphoribosyltransferase 1                  |
| Hs01938284_g1 | +           | +                  | <i>MT1E</i>   | metallothionein 1E                                        |
| Hs01552593_m1 | +           | +                  | <i>OLR1</i>   | oxidized low density lipoprotein (lectin-like) receptor 1 |
| Hs01667582_m1 | +           | -                  | <i>SAA2</i>   | serum amyloid A2                                          |
| Hs00972656_m1 | +           | +                  | <i>TERT</i>   | telomerase reverse transcriptase                          |
